# Supplementary material
Source: PubMed Central journal article supplement (PMC6534967)
Supplement: NIHMS1022497-supplement-Supplemental_Document.pdf [file NIHMS1022497-supplement-Supplemental_Document.pdf]

## Supplementary Materials for Targeting the NF- $\kappa$ B signaling pathway in chronic tendon disease

Adam C. Abraham, Shivam A. Shah, Mikhail Golman, Lee Song, Xiaoning Li, Iden Kurtaliaj, Moeed Akbar, Neal L. Millar, Yousef Abu-Amer, Leesa M. Galatz, Stavros Thomopoulos\*

\*Corresponding author. Email: sat2@columbia.edu

Published 27 February 2019, *Sci. Transl. Med.* **11**, eaav4319 (2019)  
DOI: 10.1126/scitranslmed.aav4319

### This PDF file includes:

- Fig. S1. Gene expression of cultured tendon fibroblasts in response to varying doses of IL-1 $\beta$ .
- Fig. S2. Multiplex ELISA of cultured tendon fibroblasts in response to 10 ng of IL-1 $\beta$  over the 72-hour period.
- Fig. S3. H&E- and Toluidine blue-stained section of tendons and tendon entheses of WT, IKK $\beta$ KO<sup>Scx</sup>, and IKK $\beta$ CA<sup>Scx</sup> mice.
- Fig. S4.  $\mu$ CT results for treadmill overuse model.
- Fig. S5.  $\mu$ CT results for acute injury and repair model.
- Fig. S6. Gene expression of cultured human tendon fibroblasts in response to IL-1 $\beta$  and IKK $\beta$  inhibitor.
- Fig. S7. Schematic of how IKK $\beta$ /NF- $\kappa$ B drives chronic tendinopathy.
- Table S1. Semiquantitative histological assessment of supraspinatus tendons in WT, IKK $\beta$ KO<sup>Scx</sup>, and IKK $\beta$ CA<sup>Scx</sup> mice.

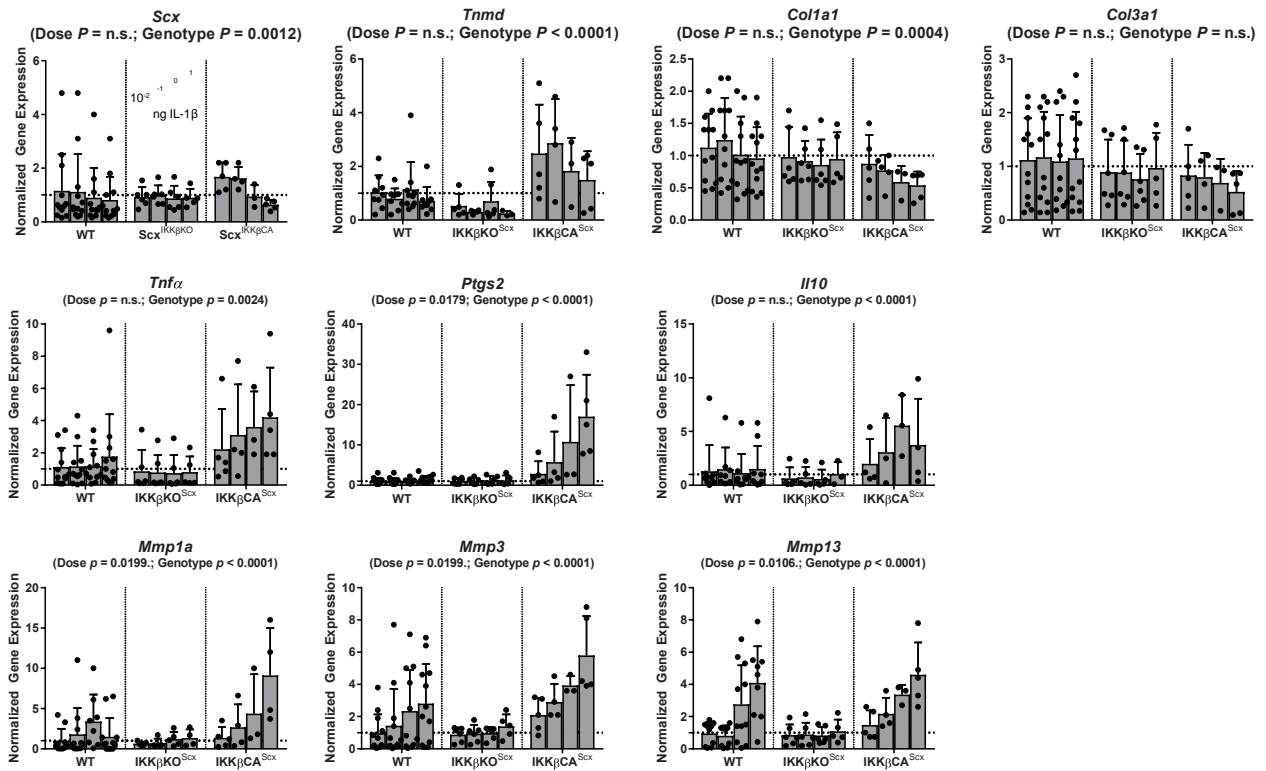

**Fig. S1. Gene expression of cultured tendon fibroblasts in response to varying doses of IL-1 $\beta$ .** Fibroblasts were isolated from tail tendons from wildtype (WT,  $n = 10$ ), tendon-specific IKK $\beta$  knockout (IKK $\beta$ KO<sup>Scx</sup>,  $n = 6$ ), and constitutively active IKK $\beta$  (IKK $\beta$ CA<sup>Scx</sup>,  $n = 5$ ) mice. Gene expression is normalized to *GAPDH*. Data are shown as mean  $\pm$  SD. Statistically significant differences were calculated using two-way ANOVA (genotype, dose) with Tukey's post-hoc test.

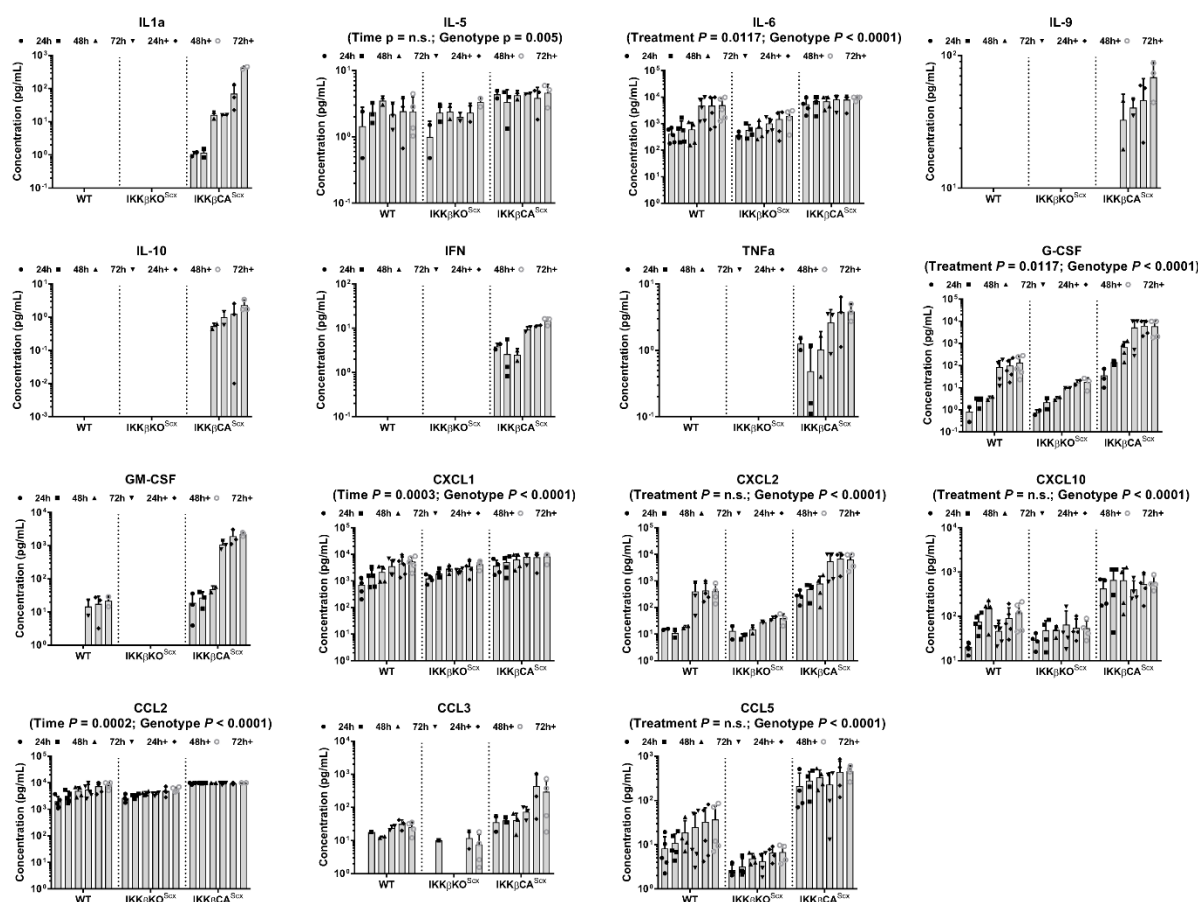

**Fig. S2. Multiplex ELISA of cultured tendon fibroblasts in response to 10 ng IL-1 $\beta$  over the 72-hour period.** Fibroblasts were isolated from tail tendons from wildtype (WT,  $n = 5$ ), tendon-specific IKK $\beta$  knockout (IKK $\beta$ KO<sup>Scx</sup>,  $n = 5$ ), and constitutively active IKK $\beta$  (IKK $\beta$ CA<sup>Scx</sup>,  $n = 5$ ) mice. Bars represent mean + SD. Statistically significant differences were calculated using two-way ANOVA (genotype, treatment) with Tukey's post-hoc test. Datasets without reported  $P$ -values were not compared due to undetectable baseline cytokine concentrations in WT controls.

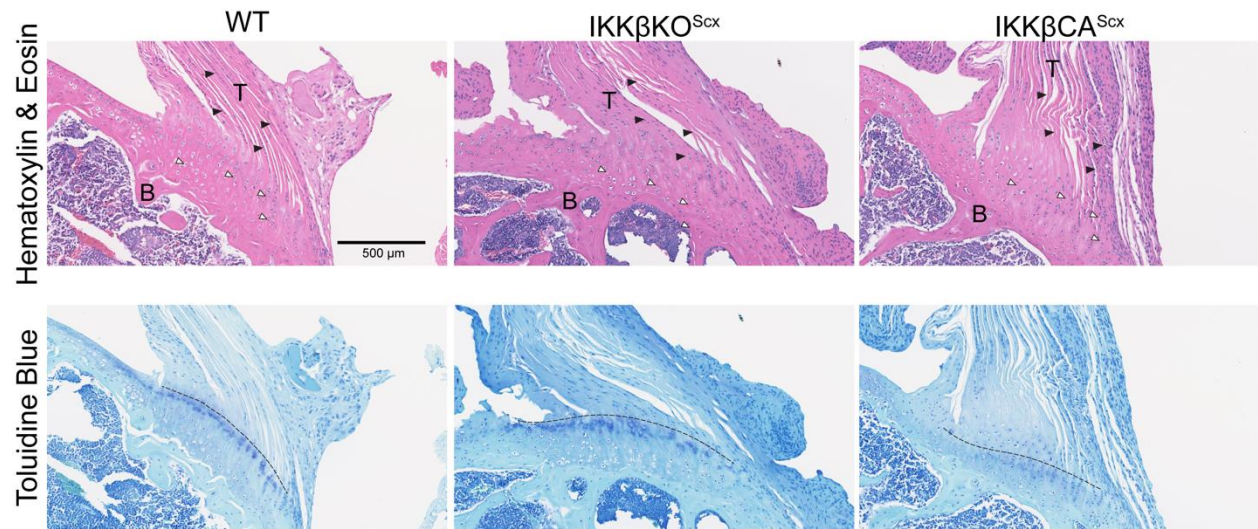

**Fig. S3. H&E- and Toluidine blue-stained section of tendons and tendon entheses of WT,  $IKK\beta KO^{Scx}$ , and  $IKK\beta CA^{Scx}$  mice.** Black arrowheads: spindle shaped tendon fibroblasts indicated, white arrowheads: enthesal chondrocytes; metachromasia demonstrating fibrocartilage interface can be seen below the dashed line in Toluidine Blue-stained sections.

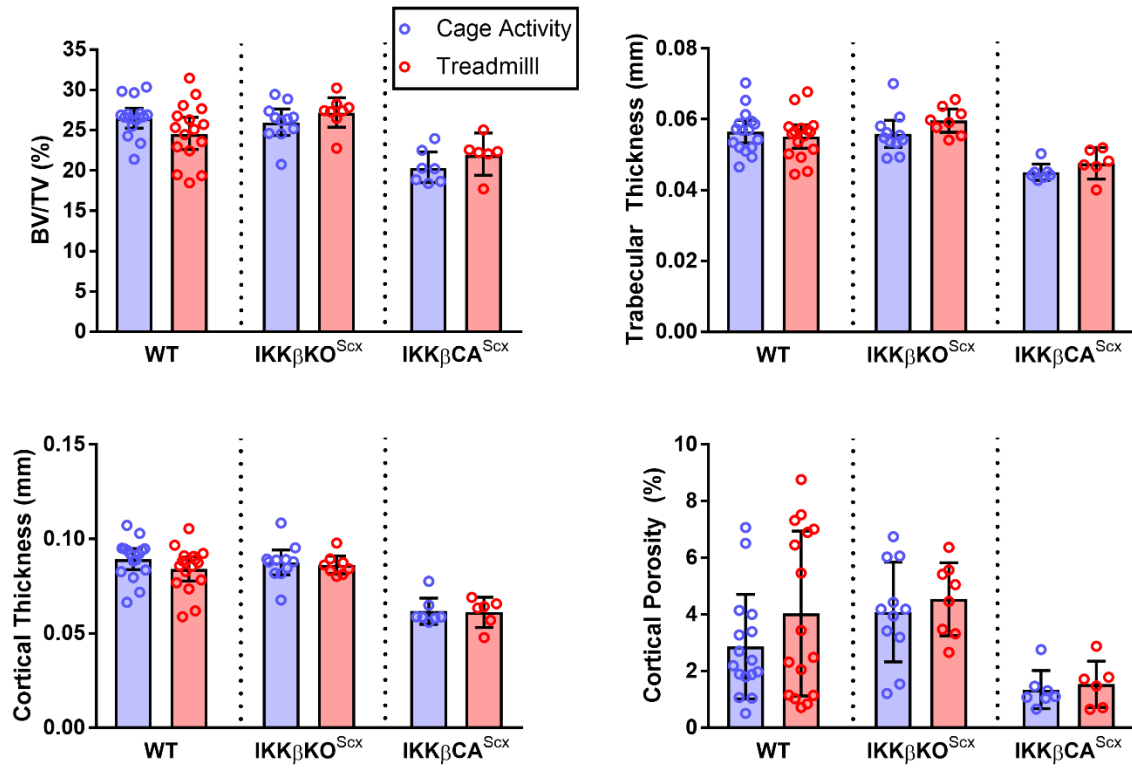

**Fig. S4.  $\mu$ CT results for treadmill overuse model.** 10-week-old mice were subjected to a chronic overuse protocol with 1 week of progressive training followed by 4 weeks of downhill running. Control mice were permitted normal cage activity. The humeral head was scanned at an energy of 55 kVP, intensity of 145  $\mu$ A, and a resolution of 12.3  $\mu$ m. Data are shown as mean  $\pm$  SD with individual points representing biologically independent samples.

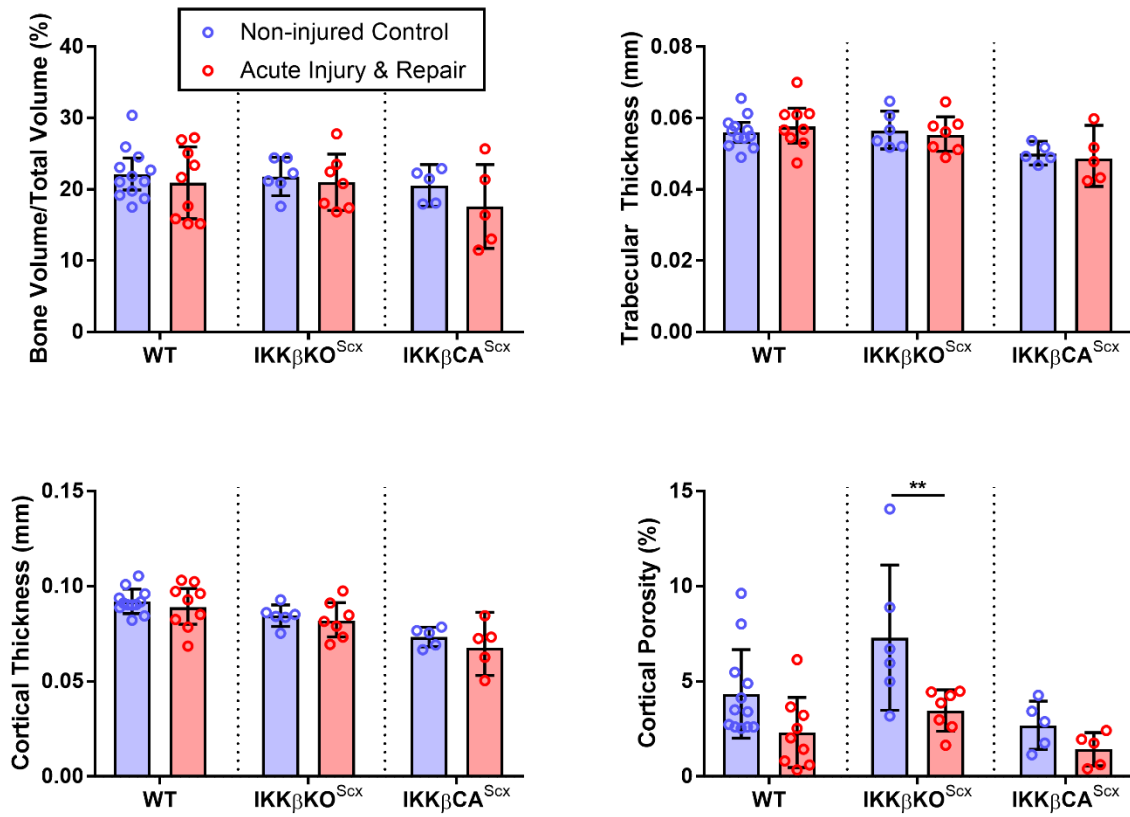

**Fig. S5.  $\mu$ CT results for acute injury and repair model.** 10-week-old mice were subjected to a unilateral acute injury of the supraspinatus tendon and immediate repair followed by 2 weeks of recovery. Sham operations were performed on contralateral limbs. The humeral head was scanned at an energy of 55 kVP, intensity of 145  $\mu$ A, and a resolution of 12.3  $\mu$ m. Data are shown as mean  $\pm$  SD with individual points representing biologically independent samples. Statistically significant differences were calculated using One-way ANOVA (genotype, treatment) with Fisher's LSD post-hoc test \*\* -  $P < 0.01$ .

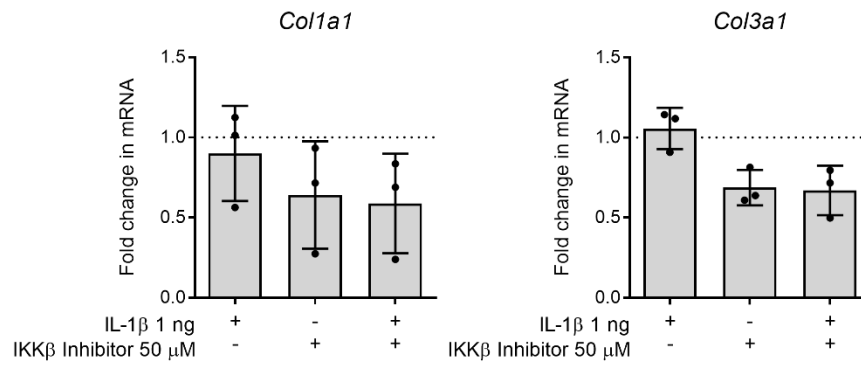

**Fig. S6. Gene expression of cultured human tendon fibroblasts in response to IL-1 $\beta$  and IKK $\beta$  inhibitor.** Data are shown as mean  $\pm$  SD with individual points representing biologically independent samples. Statistically significant differences were calculated using One-way ANOVA (treatment) with Fisher's LSD post-hoc test.

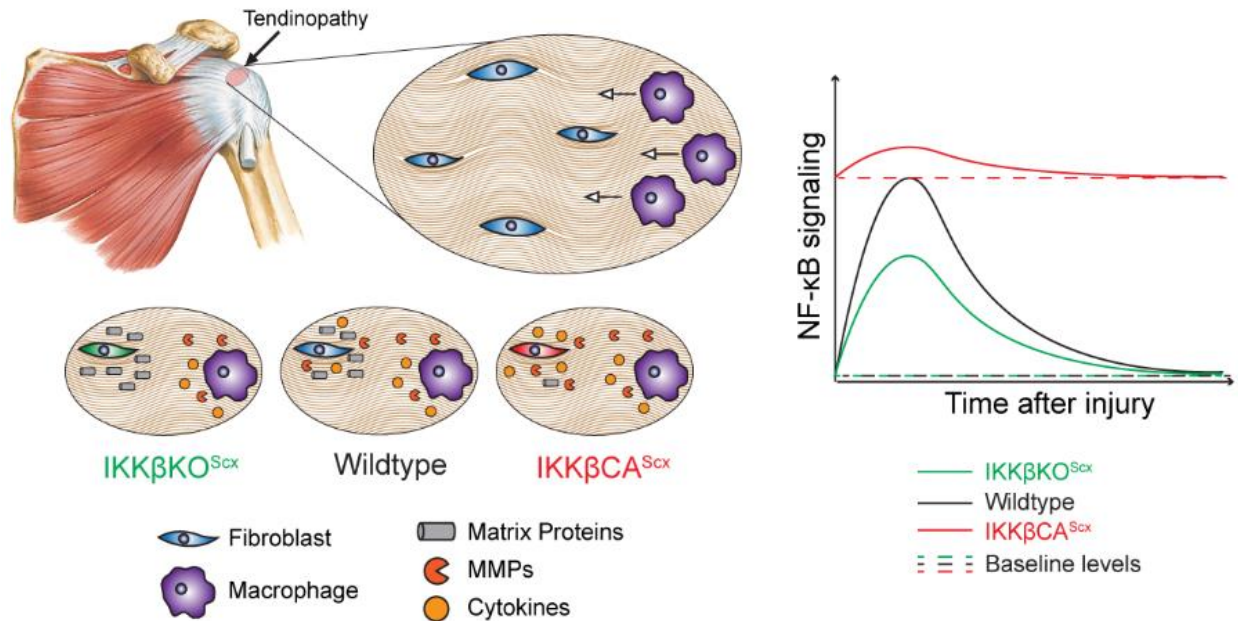

**Fig. S7. Schematic of how IKKβ/NF-κB drives chronic tendinopathy.** Schematic illustrating how injury-induced pro-inflammatory cytokines cause tendon fibroblasts to suppress tissue anabolism and increase matrix catabolism and cytokine production. NF-κB signaling within the tendon stromal and immune compartment increases during initial phases of healing. Constitutive activation of IKKβ (*IKKβCA<sup>Scx</sup>*) chronically degrades the rotator cuff by synthesizing degenerative enzymes and pro-inflammatory cytokines. Fibroblasts without IKKβ (*IKKβKO<sup>Scx</sup>*) remain agnostic to proinflammatory cytokines, maintain matrix production, and keep total NF-κB signaling lower. Dotted lines represent basal expression.

**Table S1. Semi-quantitative histological assessment of supraspinatus tendons in WT, IKK $\beta$ KO<sup>Scx</sup>, IKK $\beta$ CA<sup>Scx</sup> mice.** Mast Cells, PMN Acute Inflammatory Cells, Monocytes: # of samples where present.

|                                 | <b>WT (<i>n</i> = 8)</b> | <b>IKK<math>\beta</math>KO<sup>Scx</sup> (<i>n</i> = 4)</b> | <b>IKK<math>\beta</math>CA<sup>Scx</sup> (<i>n</i> = 4)</b> |
|---------------------------------|--------------------------|-------------------------------------------------------------|-------------------------------------------------------------|
| <b>Mast Cells</b>               | 1 of 8                   | 3 of 4                                                      | 1 of 4                                                      |
| <b>PMN</b>                      | 0 of 8                   | 0 of 4                                                      | 0 of 4                                                      |
| <b>Monocytes</b>                | 8 of 8                   | 4 of 4                                                      | 4 of 4                                                      |
| <b>Total Inflammatory Cells</b> | 1.00 (1,1)               | 1.00 (1,1)                                                  | 2.00 (2,2)                                                  |
| <b>Total Cellularity</b>        | 1.13 (1,2)               | 1.75 (1,3)                                                  | 3.00 (3,3)                                                  |
